# Supplementary material
Source: bioRxiv or medRxiv preprint supplement (https://www.biorxiv.org/highwire/filestream/10968/field_highwire_adjunct_files/5/040386-6.pdf)
Supplement: Supplementary file [file 040386-6.pdf]

## Dengue

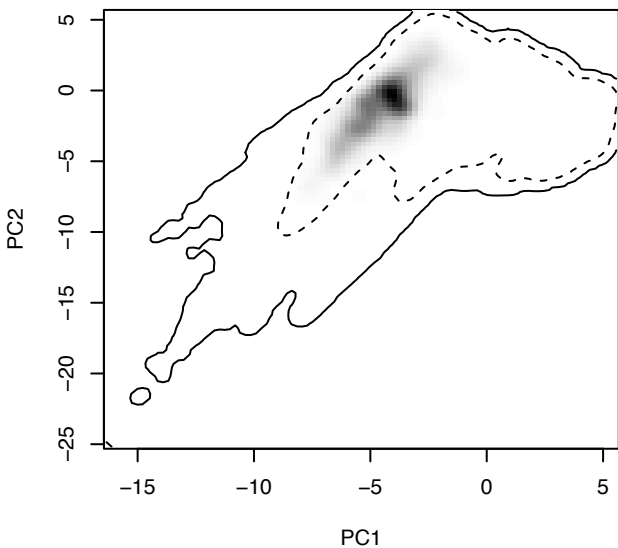

## Zika

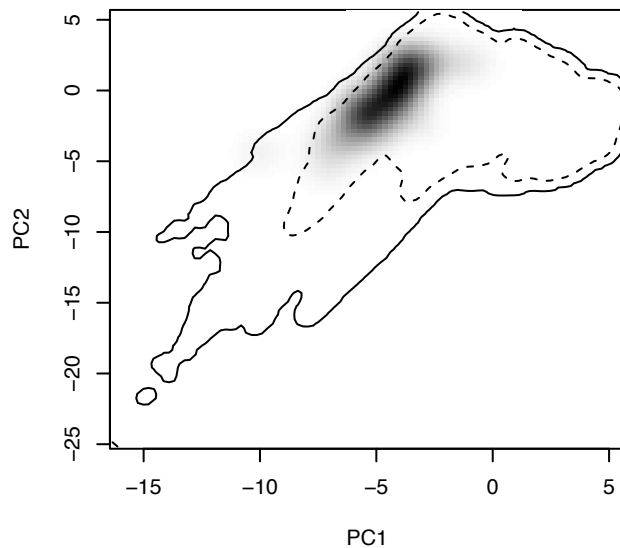

## correlation circle

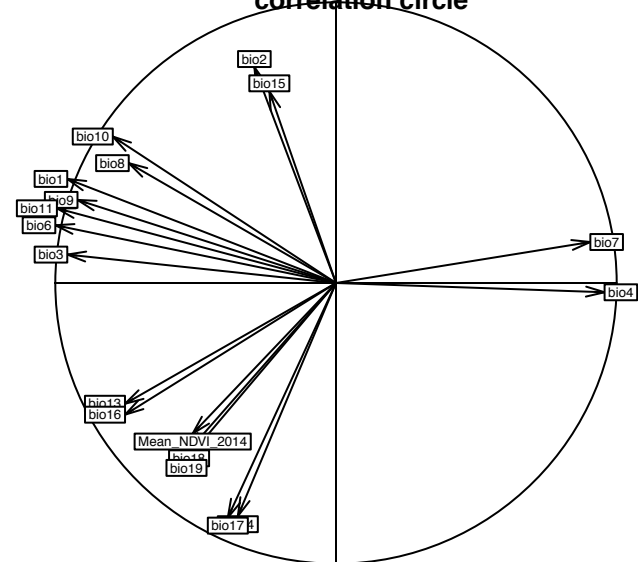

axis1 = 50.74 % axis2 = 24.07 %

niche overlap:  
D= 0.256

## Equivalency

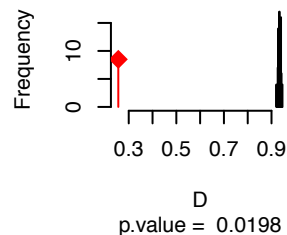

p.value = 0.0198

## Similarity 2→1

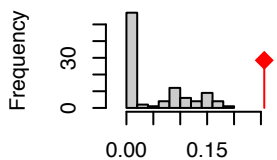

D  
p.value = 0.0099

## Similarity 1→2

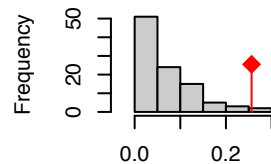

D  
p.value = 0.0297
